# Supplementary material for: Extraction of gallium from simulated Bayer process liquor by Kelex 100 dissolved in ionic liquids
Source: Royal Society of Chemistry journal article supplement (doi:10.1039/c9dt04623b), 2020-01-01
Supplement: c9dt04623b1.pdf [file c9dt04623b1.pdf]

**Electronic Supplementary Information (ESI)**

**Extraction of gallium from simulated Bayer process liquor by Kelex 100 dissolved in ionic liquids**

Stijn Raiguel<sup>†</sup>, Wim Dehaen<sup>†</sup>, Koen Binnemans<sup>†\*</sup>

<sup>†</sup> KU Leuven, Department of Chemistry, Celestijnenlaan 200F, P.O. box 2404, B-3001 Leuven, Belgium.

\*Corresponding author:

Email: [Koen.Binnemans@kuleuven.be](mailto:Koen.Binnemans@kuleuven.be)

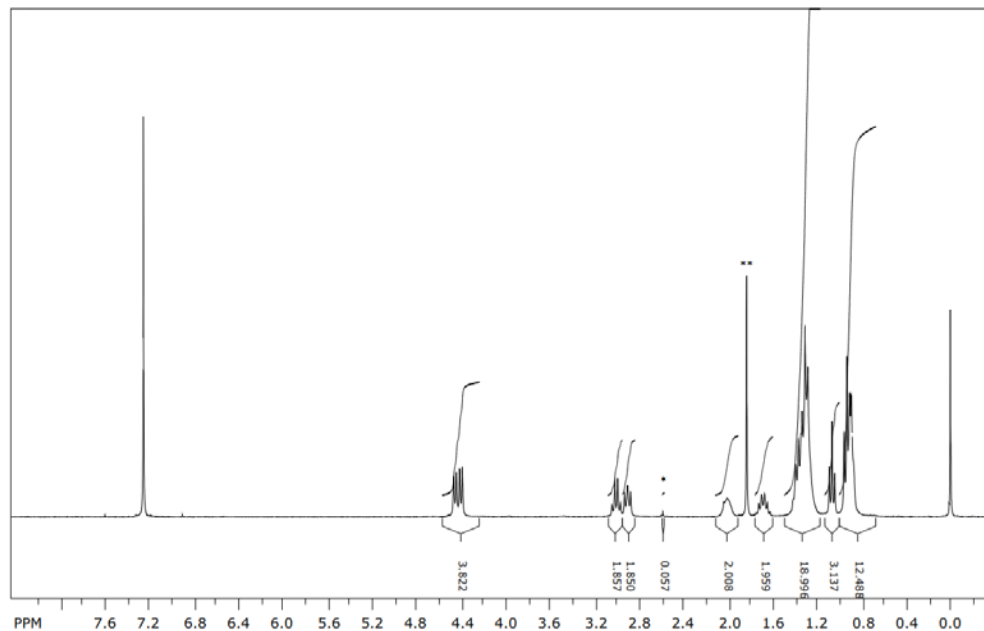

Fig. S1:  $^1\text{H}$  NMR spectrum of 1,3-bis(2-ethylhexyl)-4-methyl-5-propyl-1,2,3-triazolium sulfate. Also visible: residual methanesulfonate (\*, 2 mol%) and water (\*\*).

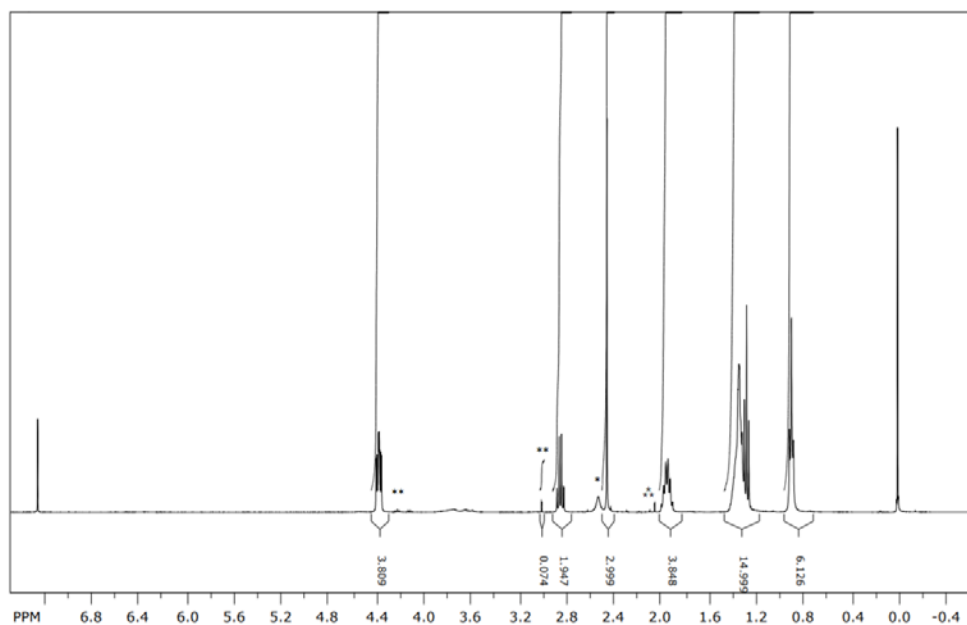

Fig. S2:  $^1\text{H}$  NMR spectrum of 1,3-bis(2-ethylhexyl)-4-methyl-5-propyl-1,2,3-triazolium sulfate. Also visible: residual water (\*), hexylmethanesulfonate (\*, 2 mol%) and residual acetone in sample tube (\*).

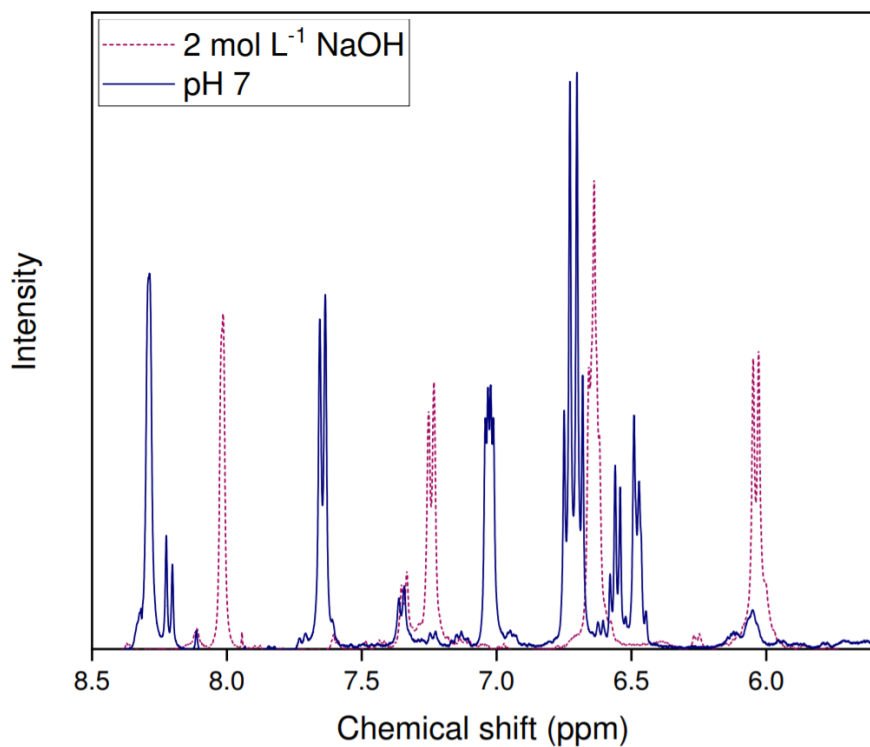

Fig. S3:  $^1\text{H}$  NMR spectra of Kelex 100 (aromatic region) in  $[\text{EhEhT}_{23}]_2[\text{SO}_4]$  after contact with demineralized water (pH 7) and  $2 \text{ mol L}^{-1}$  sodium hydroxide, showing the broadening and upfield shift caused by saponification.

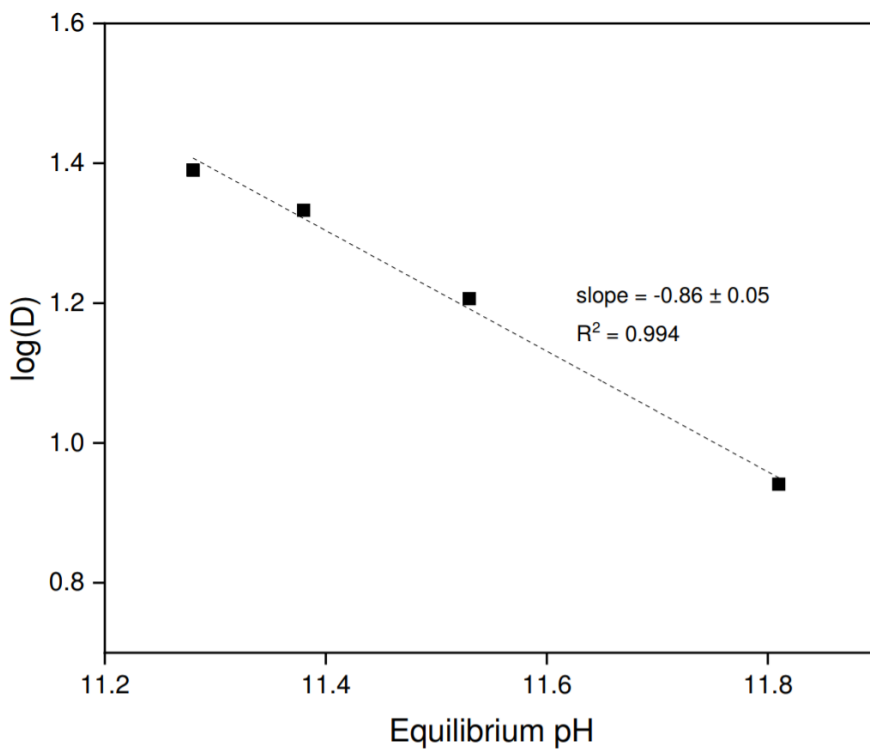

Fig. S4: Variation of the logarithmic distribution ratio of gallium with the equilibrium pH value for 200 ppm solutions extracted from  $1.700 \text{ mol L}^{-1}$  sodium carbonate by  $0.124 \text{ mol/mol}$  Kelex<sup>®</sup> 100 in  $[\text{EhEhT}_{23}]_2[\text{SO}_4]$ . Phase ratio: 1:2 organic to aqueous. The HLL procedure was followed.

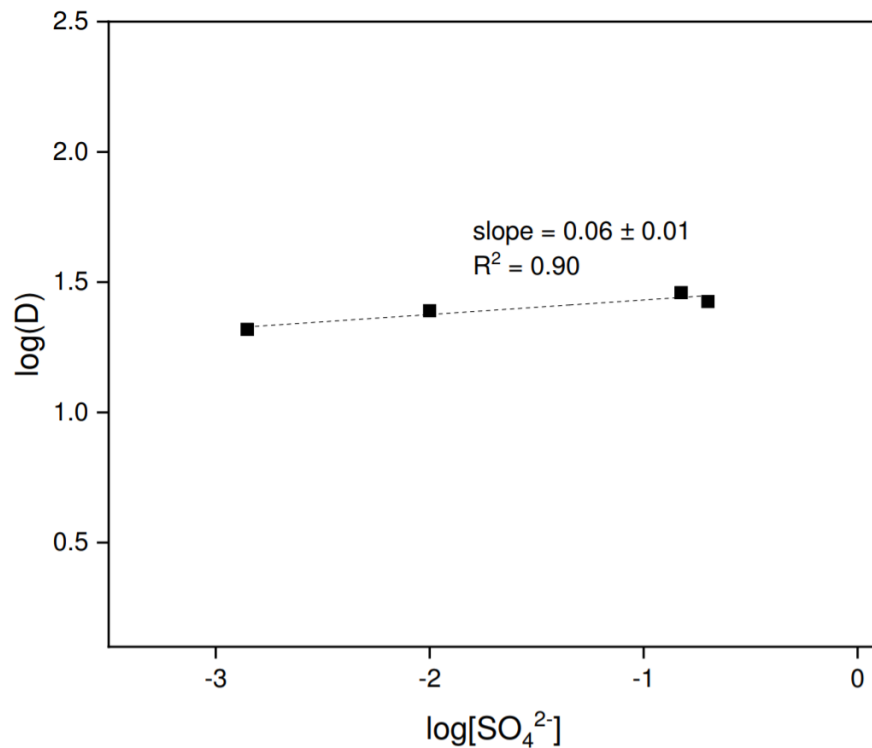

Fig. S5: Variation of the logarithmic distribution ratio of gallium with the logarithmic sulfate concentration for 200 ppm solutions extracted from  $1.700 \text{ mol L}^{-1}$  sodium carbonate by  $0.124 \text{ mol/mol}$  Kelex<sup>®</sup> 100 in  $[\text{EhEhT}_{23}]_2[\text{SO}_4]$ . Phase ratio: 1:2 organic to aqueous. The HLLC procedure was followed.

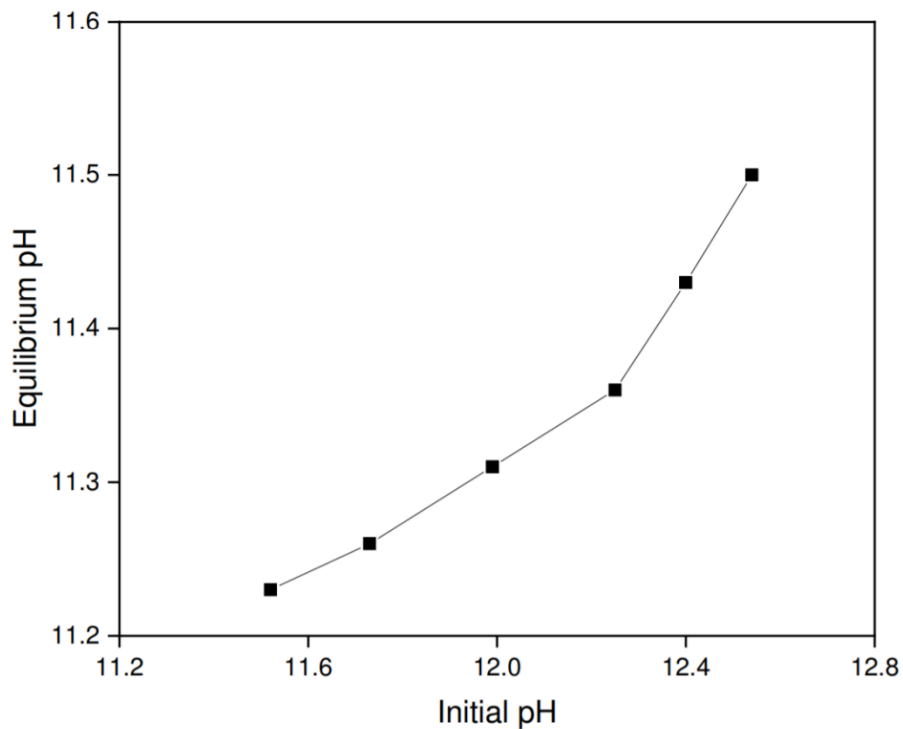

Fig. S6: Variation of the aqueous phase pH upon extraction of gallium and aluminum (200 ppm each) from carbonate solutions ( $1.700 \text{ mol L}^{-1}$ ) by 5 vol% Kelex 100 in  $[\text{EhEhT}_{23}]_2[\text{SO}_4]$ .

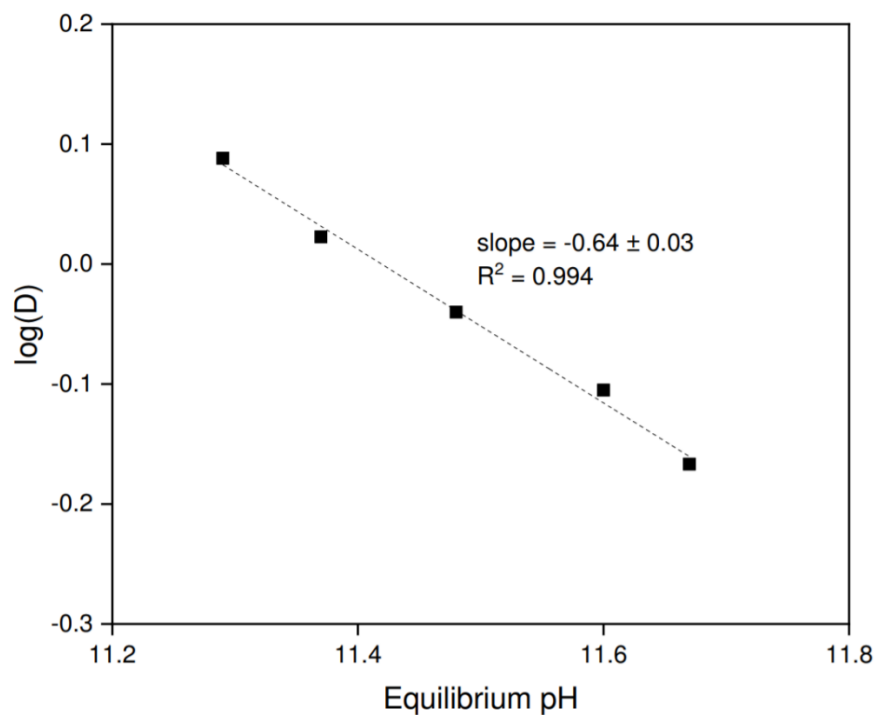

Fig. S7: Variation of the logarithmic distribution ratio of aluminum with the equilibrium pH value for 200 ppm solutions extracted from  $1.700 \text{ mol L}^{-1}$  sodium carbonate by  $0.124 \text{ mol/mol}$  Kelex<sup>®</sup> 100 in  $[\text{EhEt}_{23}]_2[\text{SO}_4]$ . Phase ratio: 1:1. The HLLC procedure was followed.

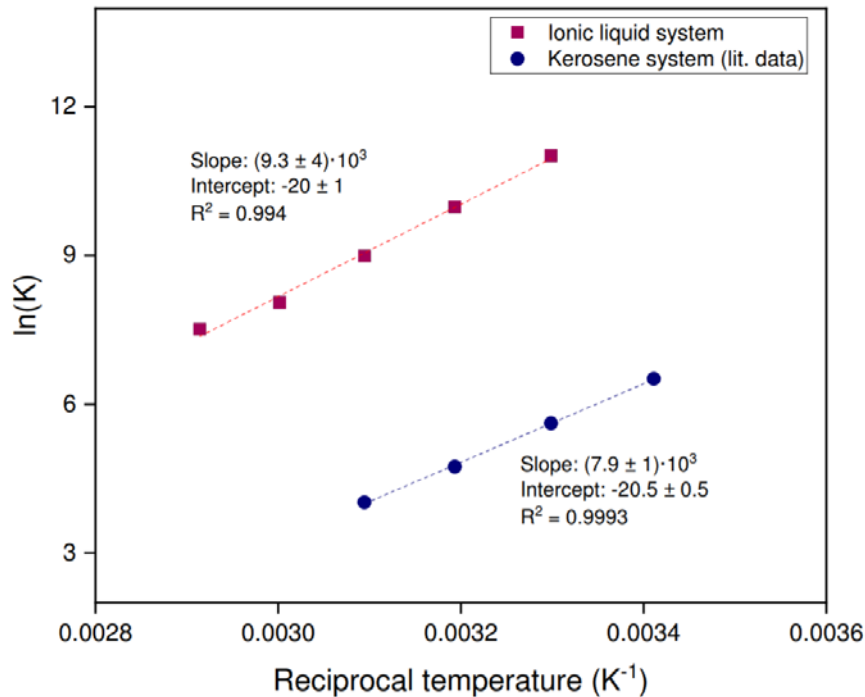

Fig. 11: Variation of the natural logarithm of the equilibrium constant of gallium extraction reciprocal temperature for 200 ppm solutions extracted from  $2.000 \text{ mol L}^{-1}$  sodium hydroxide by 5 vol% Kelex<sup>®</sup> 100 in  $[\text{HHT}_{12}][\text{Tf}_2\text{N}]$  modified with 10 vol% 1-decanol. Phase ratio: 1:2 (organic to aqueous). Also shown are literature data for extraction of gallium by 5 vol% Kelex<sup>®</sup> 100 in kerosene modified with 10 vol% 1-decanol from  $2 \text{ mol L}^{-1}$  sodium hydroxide, collected from Sato and Oishi.<sup>1</sup>

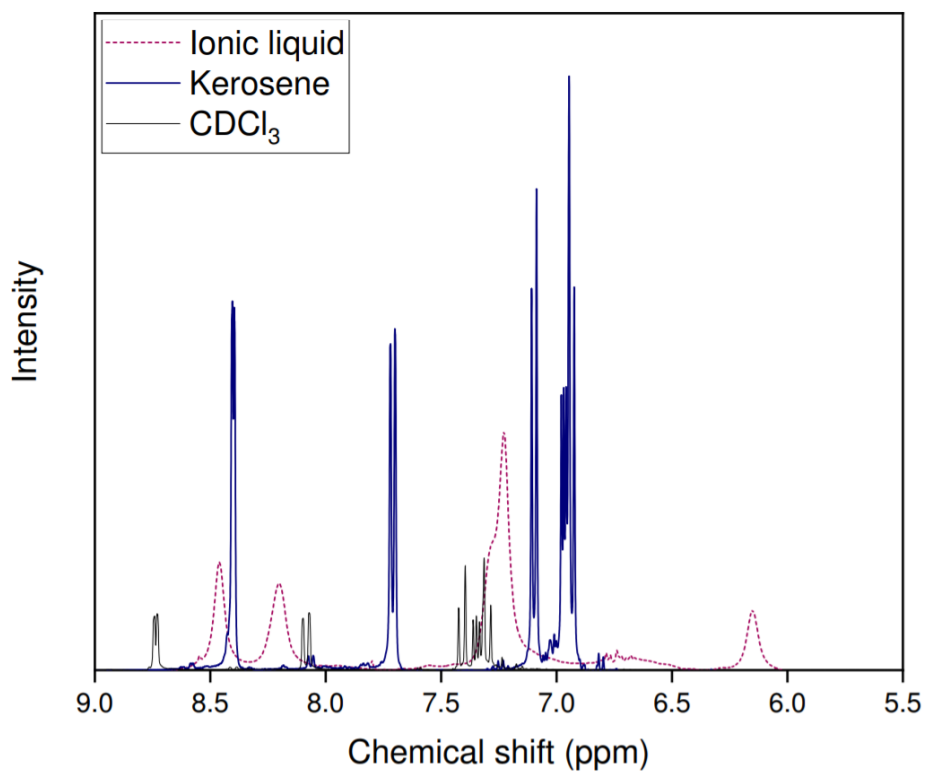

Fig. S9: <sup>1</sup>H NMR spectra of Kelex 100 (aromatic region) in [HHT<sub>12</sub>][Tf<sub>2</sub>N] modified with 10 vol% 1-decanol (ionic liquid), in kerosene modified with 10 vol% 1-decanol and in chloroform-d. Broadening of the signals in the ionic liquid is a result of the viscosity of the medium.

## Reference

1 T. Sato and H. Oishi, *Hydrometallurgy*, 1986, 16, 315–324.
